# Supplementary material for: Theophylline-bearing microspheres with dual features as a coordinative adsorbent and catalytic support for palladium ions
Source: Royal Society of Chemistry journal article supplement (doi:10.1039/c8ra06476h), 2018-01-01
Supplement: c8ra06476h1.pdf [file c8ra06476h1.pdf]

## Supporting Information

### **Theophylline-Bearing Microspheres with Dual Features as Coordinative Adsorbent and Catalytic Support for Palladium Ions**

Katsuya Kaikake\*, Masafumi Takada, Daiki Soma, and Ren-Hua Jin\*

Department of Material and Life Chemistry, Faculty of Engineering, Kanagawa University,  
3-27-1, Rokkakubashi, Kanagawa-ku, Yokohama, 221-8686, Japan

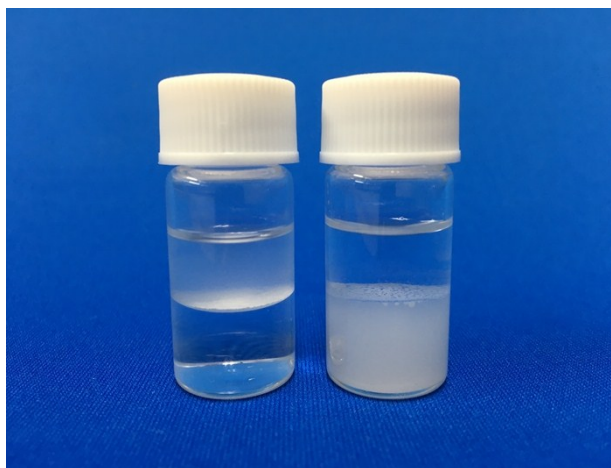

Fig. S1. Snapshot image of wettability of  $\mu$ -T1 (left),  $\mu$ -T2 (right) (5mg) in the phase-separated mixture of diethyl ether/water (2.0 mL/2.0 mL).

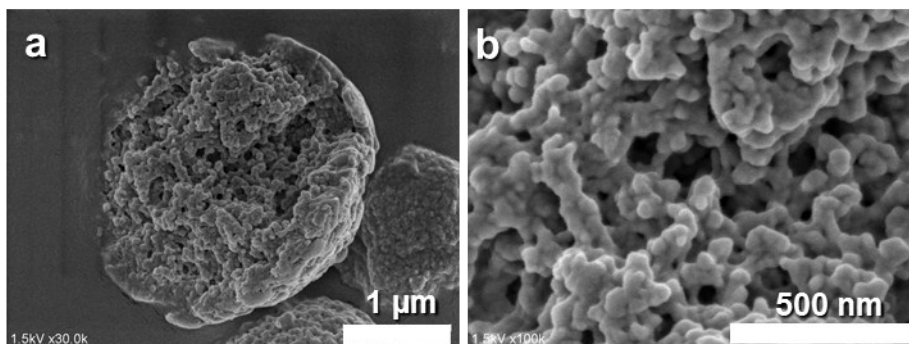

Fig. S2. SEM section images of the internal structure of  $\mu$ -T2.

Table S1. Specific surface areas and pore properties of microspheres

| type of microball | surface area <sup>a)</sup><br>( $\text{m}^2 \text{g}^{-1}$ ) | Pore size<br>(nm) | pore volume<br>( $\text{cm}^3 \text{g}^{-1}$ ) |
|-------------------|--------------------------------------------------------------|-------------------|------------------------------------------------|
| $\mu$ -1          | 1.7                                                          | 76.3              | 0.0055                                         |
| $\mu$ -T1         | 1.9                                                          | 61.7              | 0.0068                                         |
| $\mu$ -2          | 1.5                                                          | 77.0              | 0.0071                                         |
| $\mu$ -T2         | 1.9                                                          | 62.2              | 0.0130                                         |

a) Specific surface area based BET method.

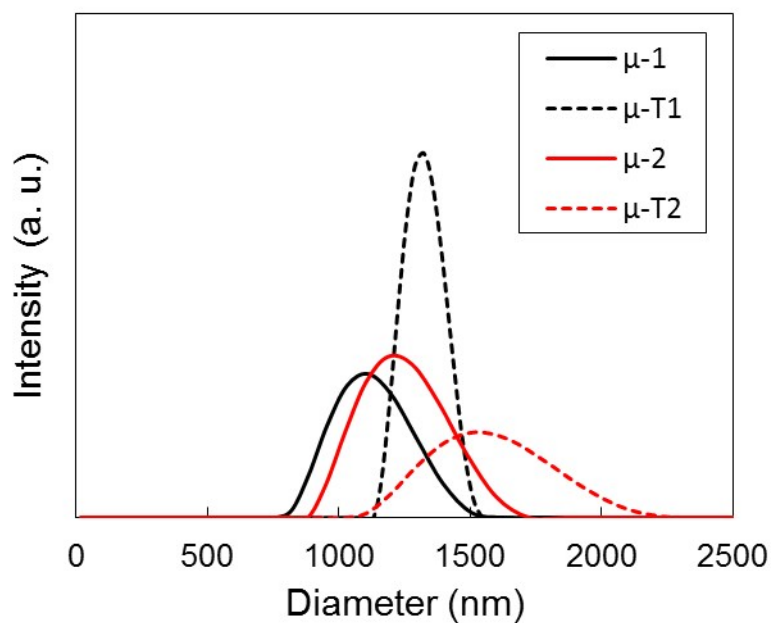

Fig. S3. DLS results of  $\mu-1$ ,  $\mu-T1$  and  $\mu-2$ ,  $\mu-T2$ .

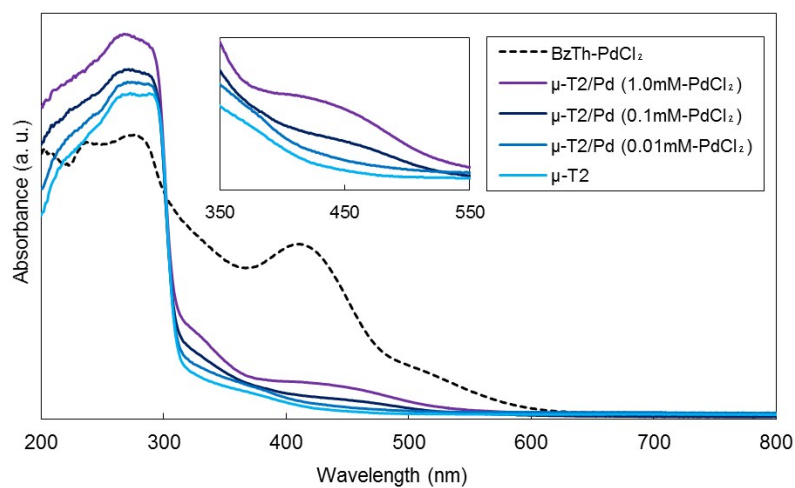

Fig. S4. UV-vis spectra of  $\mu-T2$  adsorbed from different palladium(II) concentration solutions and comparison of benzyltheophylline-PdCl<sub>2</sub> complex. Enlargement view indicate absorbance at 420 nm corresponding to palladium.

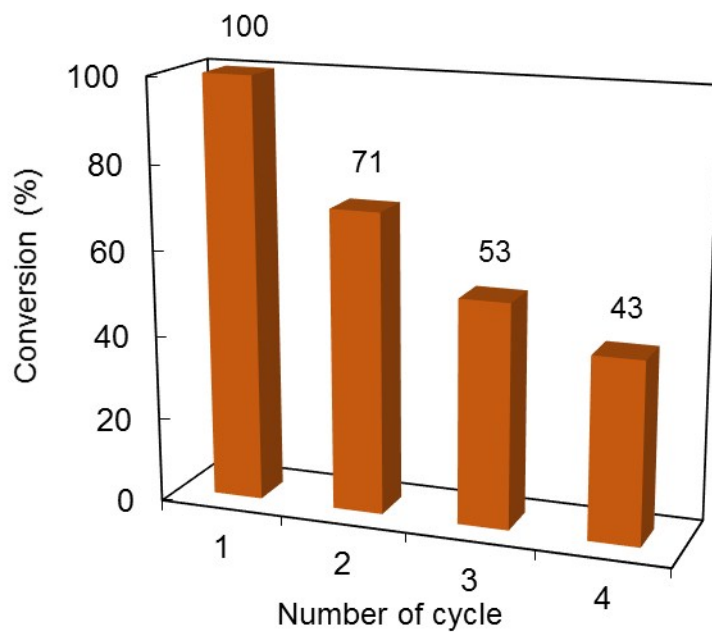

Fig. S5. The recycling test of the catalyst of Pd-loaded microsphere of  $\mu$ -T2. Reaction conditions: bromobenzene (1.0 mmol), phenylboronic acid (1.5 mmol),  $K_2CO_3$  (2.5 mmol), 2.0 mol% of Pd,  $H_2O$  (2 mL), 50 °C for 1h.

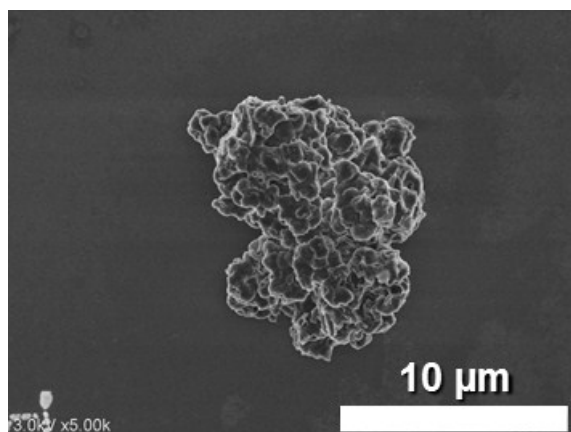

Fig. S6. SEM image of Pd-loaded  $\mu$ -T2 after reuse of the 4th time.
